# Supplementary material
Source: PubMed Central journal article supplement (PMC2927856)
Supplement: NIHMS224184-supplement-Figure_S2.pdf [file NIHMS224184-supplement-Figure_S2.pdf]

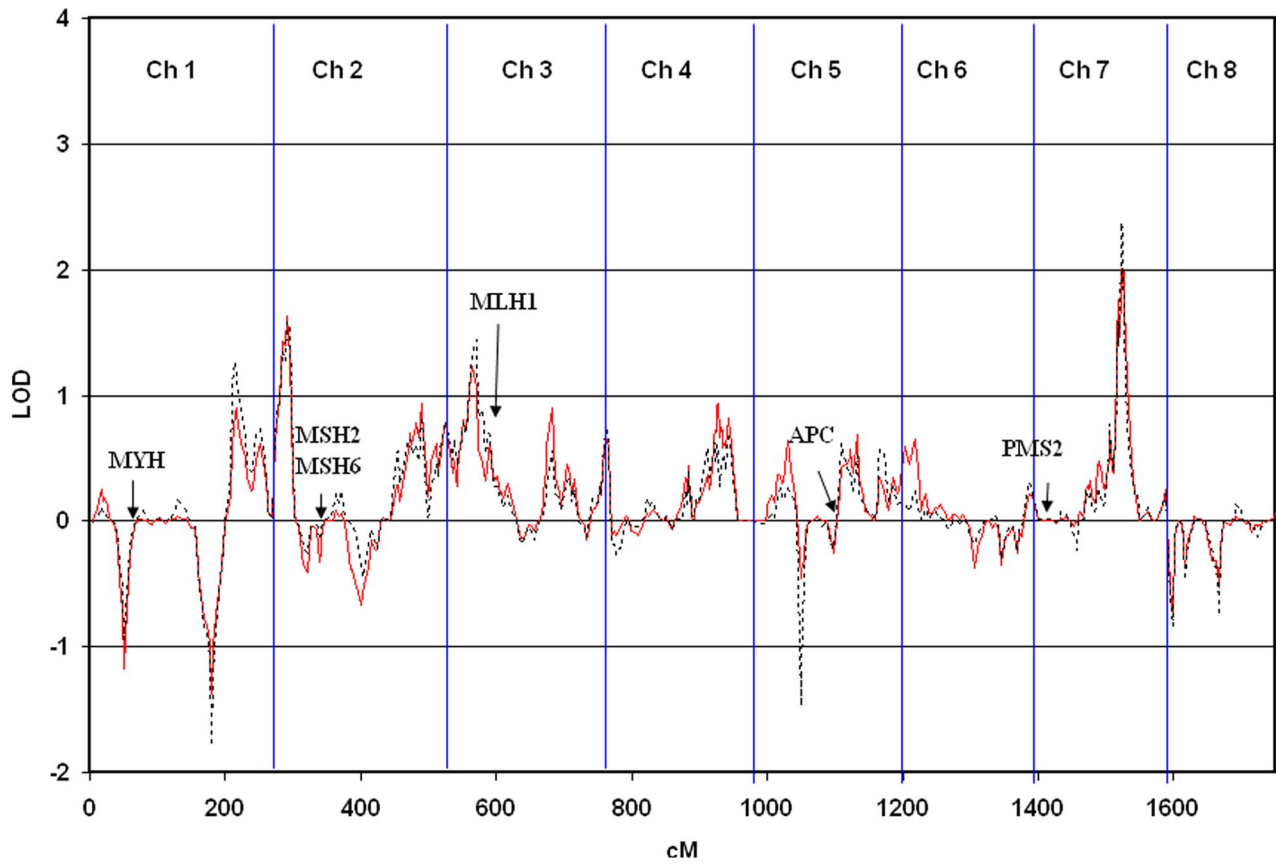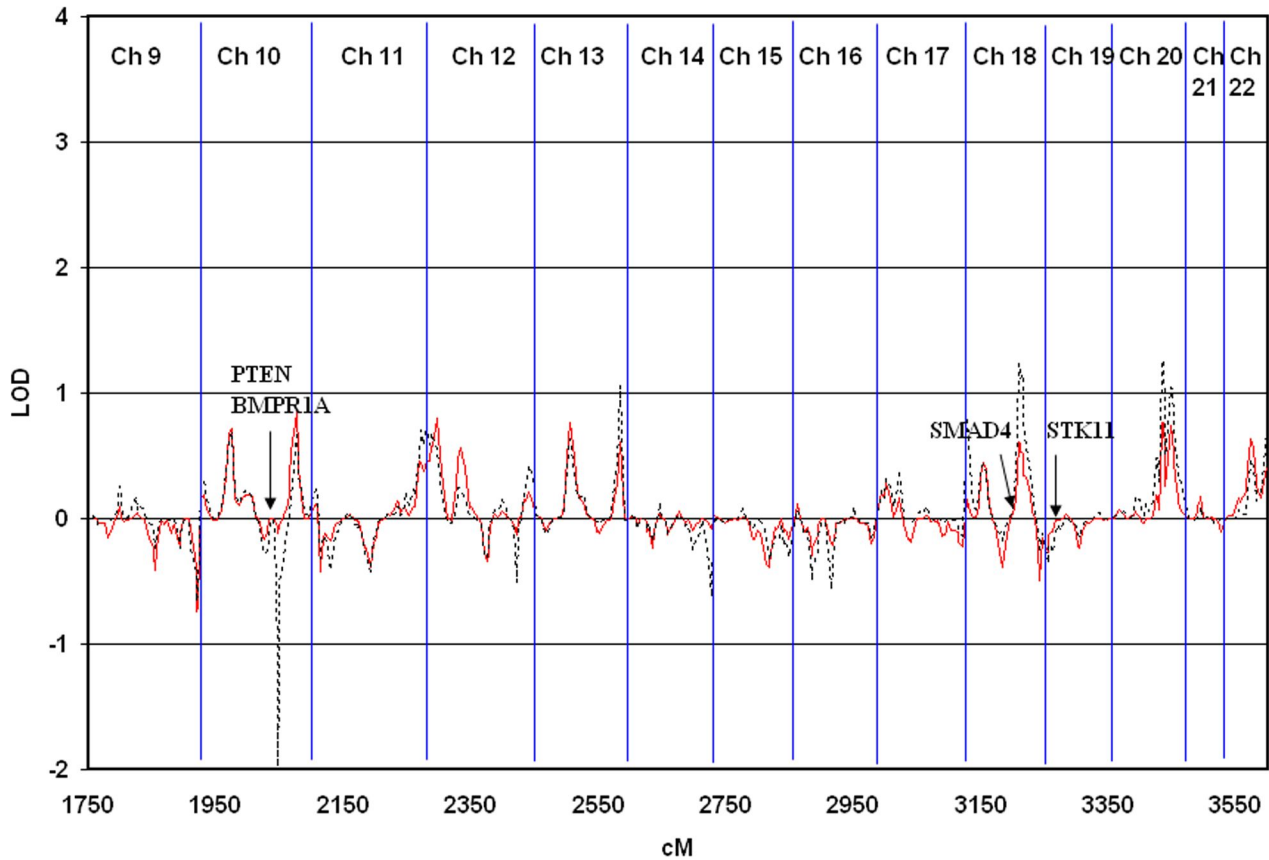

Figure S2: Nonparametric analysis of linkage excluding 7 MSI-high families with sibpair study allele frequencies
