# Supplementary material
Source: PubMed Central journal article supplement (PMC2927856)
Supplement: NIHMS224184-supplement-Figure_S3.pdf [file NIHMS224184-supplement-Figure_S3.pdf]

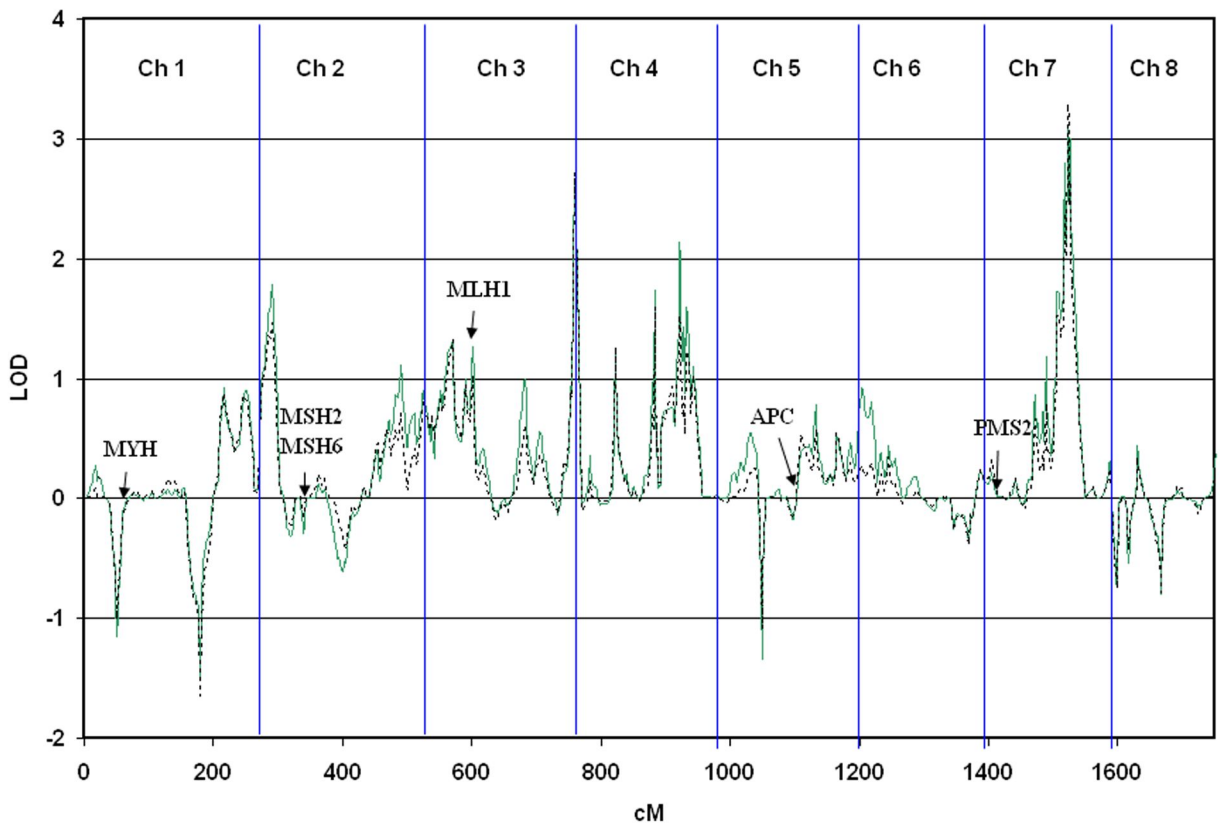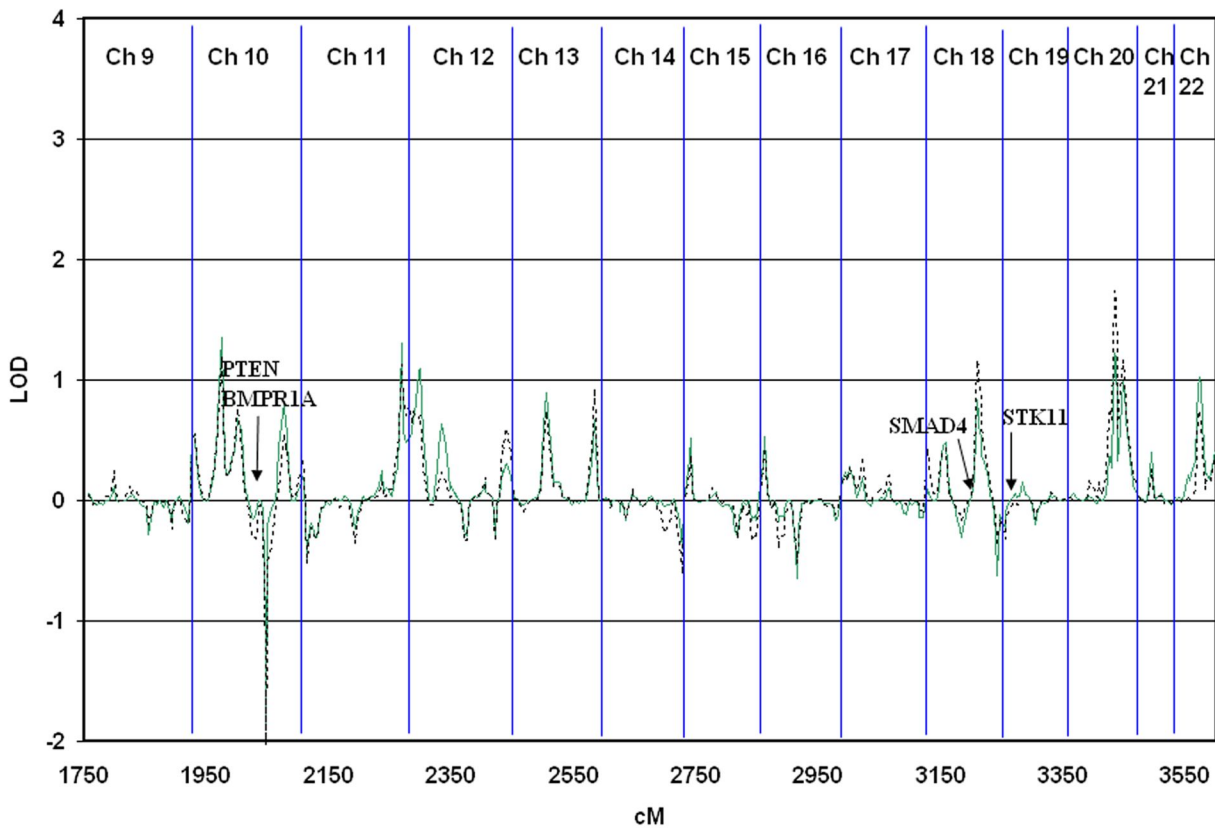

Figure S3: Nonparametric analysis of linkage excluding 7 MSI-high families with CEPH control allele frequencies
