# Supplementary material
Source: PubMed Central journal article supplement (PMC2927856)

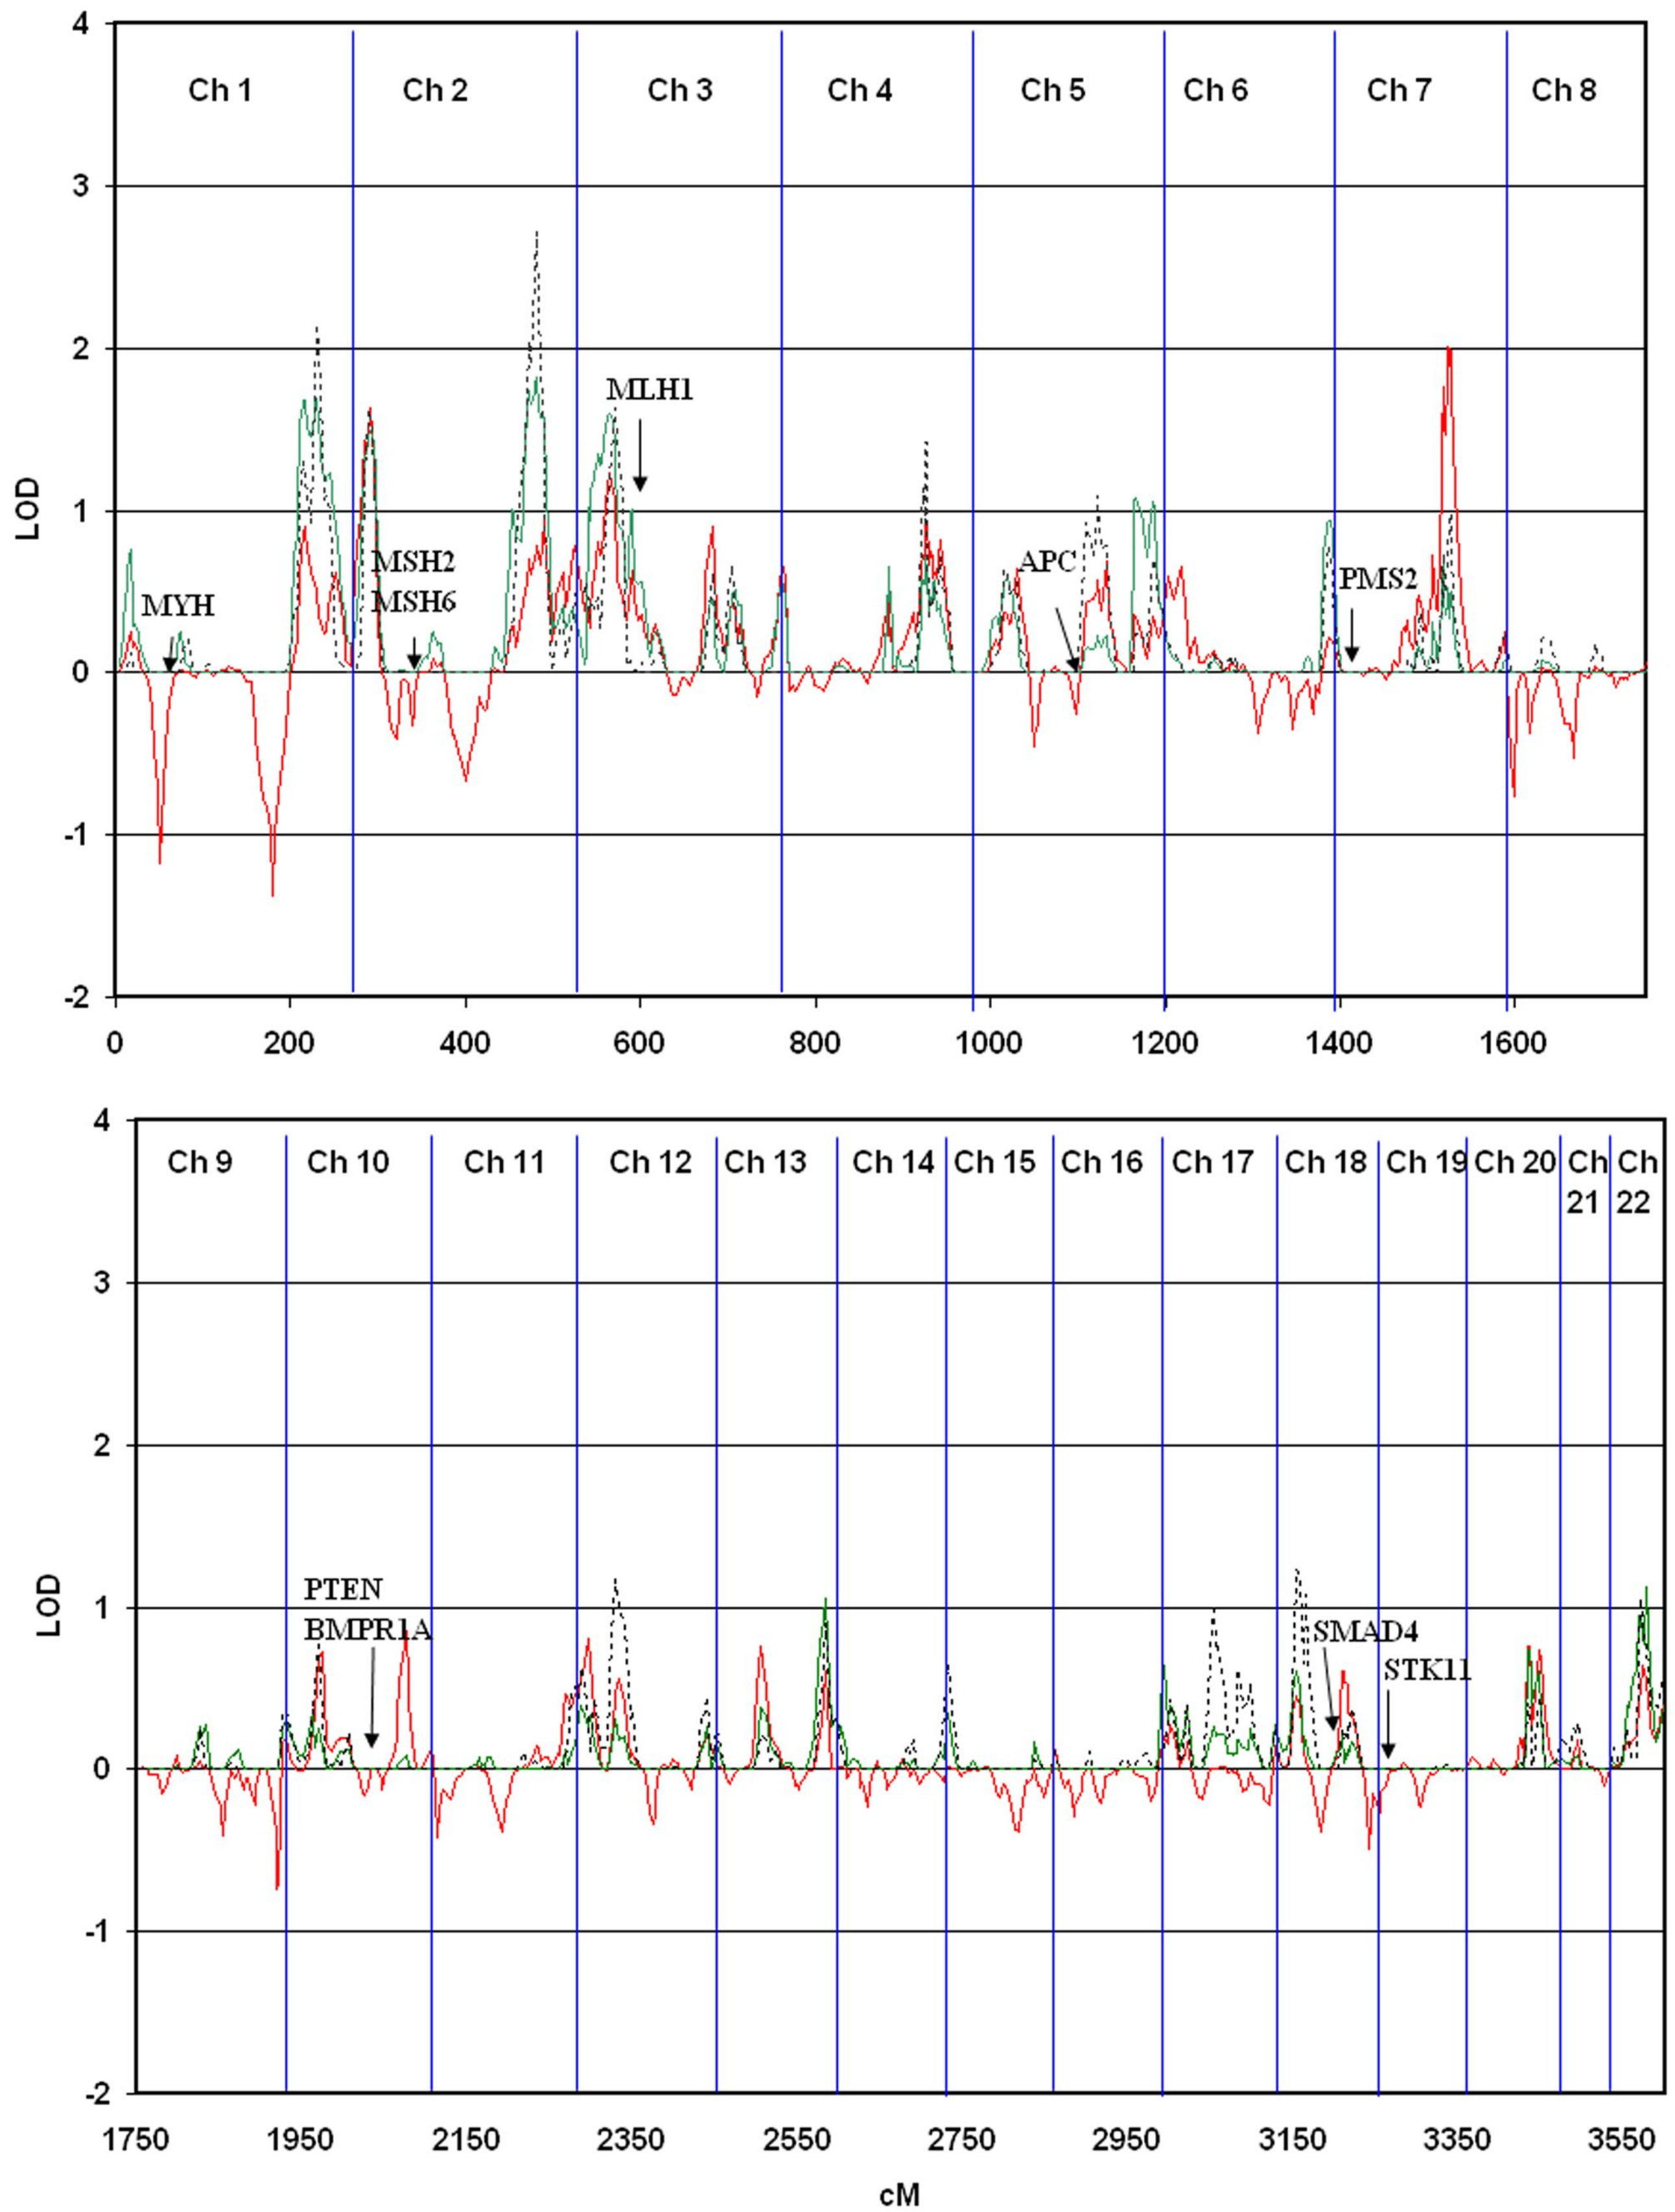

Figure S1: Parametric and nonparametric linkage analysis

Supplement: NIHMS224184-supplement-Figure_S1.pdf [file NIHMS224184-supplement-Figure_S1.pdf]

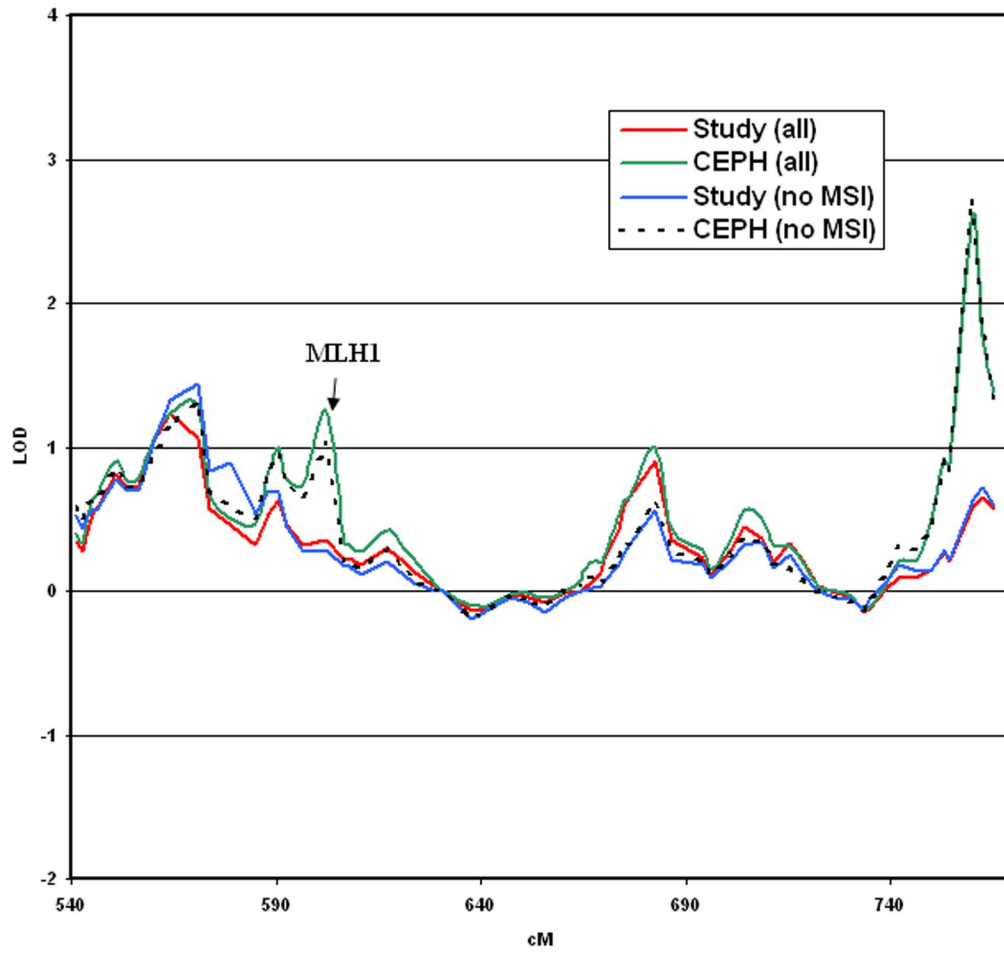

Figure S4: Nonparametric analysis of linkage to chromosome 3

Supplement: NIHMS224184-supplement-Figure_S4.pdf [file NIHMS224184-supplement-Figure_S4.pdf]
